# Supplementary material for: Identification of proteins and bacteria based on a metal ion–gold nanocluster sensor array
Source: Royal Society of Chemistry journal article supplement (doi:10.1039/c8ay00558c), 2018-01-01
Supplement: c8ay00558c1.pdf [file c8ay00558c1.pdf]

# Identification of Proteins and Bacteria Based on Metal Ions- Gold Nanoclusters Sensor Array

Yayan Wu\*<sup>&</sup>, Bing Wang<sup>&</sup>, Kai Wang, Peng Yan

*Key Laboratory of Biomedical Information Engineering of Ministry of Education, School of Life  
Science and Technology, Xi'an Jiaotong University, 710049, Xi'an, PR China*

\*Corresponding authors: yayanwu@mail.xjtu.edu.cn. Fax: +86 29 82663941

## Table of Contents

Figure S1. Fluorescence emission spectra of protein-stabilized AuNCs (BSA-AuNCs, HAS-AuNCs and Lys-AuNCs)

Figure S2. Fluorescence emission spectra of Lys-AuNCs after co-precipitation with different cations.

Table S1 The results of precipitation formation after co-precipitation of BSA-AuNCs with various cations at different concentrations

Table S2 The results of precipitation formation after co-precipitation of Lys-AuNCs with various cations at different concentrations.

Table S3. Jackknifed Classification Matrix of LDA analysis in 8 proteins differentiation (5  $\mu$ M)

Table S4. Jackknifed Classification Matrix of LDA analysis in 8 proteins differentiation (0.5  $\mu$ M)

Table S5. Jackknifed Classification Matrix of LDA analysis in 8 proteins differentiation (50  $\mu$ M)

Table S6. Jackknifed Classification Matrix of LDA analysis in 5 bacteria differentiation

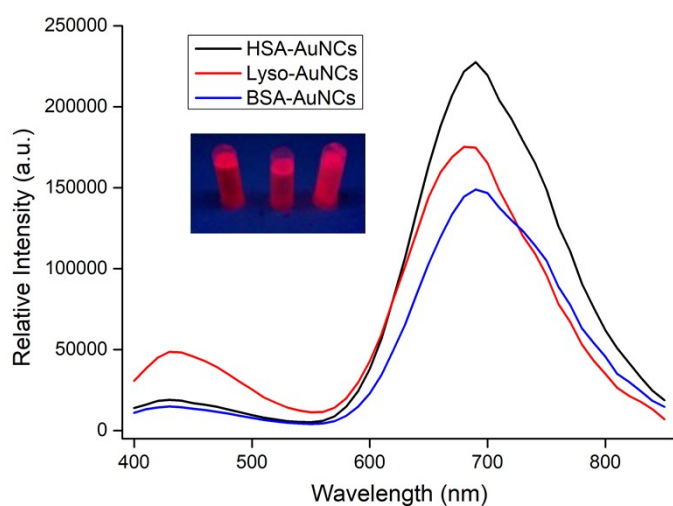

Figure S1. Fluorescence emission spectra of protein-stabilized AuNCs (BSA-AuNCs, HAS-AuNCs and Lys-AuNCs) at the excitation wavelength at 365nm.

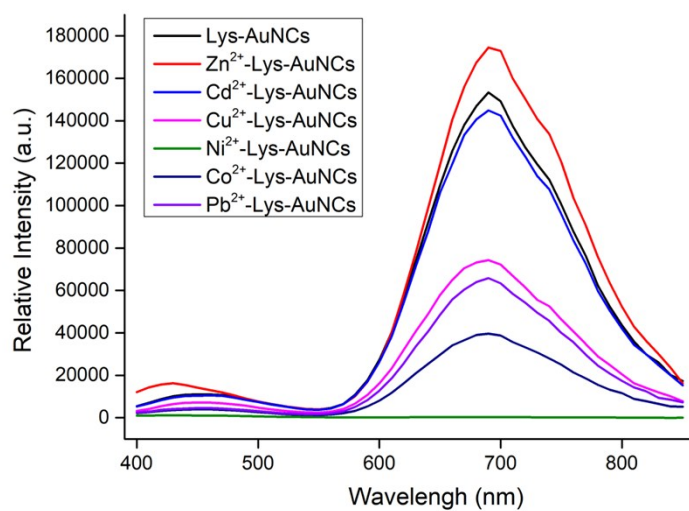

Figure S2. Fluorescence emission spectra of Lys-AuNCs after co-precipitation with different cations. The concentration of  $Zn^{2+}$ ,  $Cd^{2+}$ ,  $Cu^{2+}$ ,  $Ni^{2+}$ ,  $Co^{2+}$ , and  $Pb^{2+}$  is  $0.02 \text{ mol L}^{-1}$ .

Table S1 The results of precipitation formation after co-precipitation of BSA-AuNCs with various cations at different concentrations.

| Cations added    | 0.005<br>(mol L <sup>-1</sup> ) | 0.01<br>(mol L <sup>-1</sup> ) | 0.02<br>(mol L <sup>-1</sup> ) | 0.04<br>(mol L <sup>-1</sup> ) | 0.06<br>(mol L <sup>-1</sup> ) | 0.08<br>(mol L <sup>-1</sup> ) | 0.1<br>(mol L <sup>-1</sup> ) |
|------------------|---------------------------------|--------------------------------|--------------------------------|--------------------------------|--------------------------------|--------------------------------|-------------------------------|
| Zn <sup>2+</sup> | -                               | *                              | +                              | +                              | +                              | +                              | +                             |
| Cd <sup>2+</sup> | -                               | *                              | +                              | +                              | +                              | +                              | +                             |
| Mg <sup>2+</sup> | -                               | -                              | -                              | -                              | -                              | -                              | -                             |
| Co <sup>2+</sup> | -                               | -                              | *                              | +                              | +                              | +                              | +                             |
| Cu <sup>2+</sup> | -                               | -                              | *                              | *                              | *                              | *                              | *                             |
| Ca <sup>2+</sup> | -                               | -                              | -                              | -                              | -                              | -                              | -                             |
| Ni <sup>2+</sup> | -                               | *                              | +                              | +                              | +                              | +                              | +                             |
| Pb <sup>2+</sup> | -                               | *                              | *                              | *                              | *                              | *                              | *                             |

“-” No precipitation, “\*” Partial precipitation, “+” Complete precipitation.

Table S2 The results of precipitation formation after co-precipitation of Lys-AuNCs with various cations at different concentrations.

| Cations added    | 0.005<br>(mol L <sup>-1</sup> ) | 0.01<br>(mol L <sup>-1</sup> ) | 0.02<br>(mol L <sup>-1</sup> ) | 0.04<br>(mol L <sup>-1</sup> ) | 0.06<br>(mol L <sup>-1</sup> ) | 0.08<br>(mol L <sup>-1</sup> ) | 0.1<br>(mol L <sup>-1</sup> ) |
|------------------|---------------------------------|--------------------------------|--------------------------------|--------------------------------|--------------------------------|--------------------------------|-------------------------------|
| Zn <sup>2+</sup> | -                               | *                              | +                              | +                              | +                              | +                              | +                             |
| Cd <sup>2+</sup> | -                               | *                              | +                              | +                              | +                              | +                              | +                             |
| Mg <sup>2+</sup> | -                               | *                              | +                              | +                              | +                              | +                              | +                             |
| Co <sup>2+</sup> | -                               | *                              | +                              | +                              | +                              | +                              | +                             |
| Cu <sup>2+</sup> | -                               | *                              | +                              | +                              | +                              | +                              | +                             |
| Ca <sup>2+</sup> | -                               | -                              | -                              | -                              | -                              | -                              | -                             |
| Ni <sup>2+</sup> | *                               | +                              | +                              | +                              | +                              | +                              | +                             |
| Pb <sup>2+</sup> | -                               | -                              | *                              | +                              | *                              | *                              | *                             |

Table S3. Jackknifed Classification Matrix of LDA analysis in 9 proteins differentiation (5 $\mu$ M)

|                | BS<br>A | Casei<br>n | Lysozy<br>me | Papai<br>n | Hemoglob<br>in | Lipas<br>e | Myoglobi<br>n | Pepsi<br>n | Trypsi<br>n | %corre<br>ct |
|----------------|---------|------------|--------------|------------|----------------|------------|---------------|------------|-------------|--------------|
| BSA            | 6       | 0          | 0            | 0          | 0              | 0          | 0             | 0          | 0           | 100          |
| Casein         | 0       | 6          | 0            | 0          | 0              | 0          | 0             | 0          | 0           | 100          |
| Lysozyme       | 0       | 0          | 6            | 0          | 0              | 0          | 0             | 0          | 0           | 100          |
| Papain         | 0       | 0          | 0            | 6          | 0              | 0          | 0             | 0          | 0           | 100          |
| Hemoglobi<br>n | 0       | 0          | 0            | 0          | 6              | 0          | 0             | 0          | 0           | 100          |
| Lipase         | 0       | 0          | 0            | 0          | 0              | 6          | 0             | 0          | 0           | 100          |
| Myoglobin      | 0       | 0          | 0            | 0          | 0              | 0          | 6             | 0          | 0           | 100          |
| Pepsin         | 0       | 0          | 0            | 0          | 0              | 0          | 0             | 6          | 0           | 100          |
| Trypsin        | 0       | 0          | 0            | 0          | 0              | 0          | 0             | 0          | 6           | 100          |
| Total          | 6       | 6          | 6            | 6          | 6              | 6          | 6             | 6          | 6           | 100          |

The jackknifed classification illustrates no overlap between the groups at all, and all the cases are classified with 100% classification accuracy.

Cumulative proportion of total dispersion

|       |       |       |       |       |       |
|-------|-------|-------|-------|-------|-------|
| 0.506 | 0.970 | 0.993 | 0.998 | 1.000 | 1.000 |
|-------|-------|-------|-------|-------|-------|

From the above table, the values of different factors can be calculated. The first and second factors contribute largely to the classification, 50.6% and 46.4% (0.970-0.506) respectively. The third factor and fourth factor account for 2.3% (0.993-0.970) and 0.5% (0.998-0.993). So, it could be easily found that the first two factors can make a good identification to 8 proteins.

Table S4. Jackknifed Classification Matrix of LDA analysis in 9 proteins differentiation (0.5 $\mu$ M)

|                | BS<br>A | Casei<br>n | Lysozy<br>me | Papai<br>n | Hemoglob<br>in | Lipas<br>e | Myoglobi<br>n | Pepsi<br>n | Trypsi<br>n | %corre<br>ct |
|----------------|---------|------------|--------------|------------|----------------|------------|---------------|------------|-------------|--------------|
| BSA            | 6       | 0          | 0            | 0          | 0              | 0          | 0             | 0          | 0           | 100          |
| Casein         | 0       | 6          | 0            | 0          | 0              | 0          | 0             | 0          | 0           | 100          |
| Lysozyme       | 0       | 0          | 6            | 0          | 0              | 0          | 0             | 0          | 0           | 100          |
| Papain         | 0       | 0          | 0            | 6          | 0              | 0          | 0             | 0          | 0           | 100          |
| Hemoglobi<br>n | 0       | 0          | 0            | 0          | 6              | 0          | 0             | 0          | 0           | 100          |
| Lipase         | 0       | 0          | 0            | 0          | 0              | 6          | 0             | 0          | 0           | 100          |
| Myoglobin      | 0       | 0          | 0            | 0          | 0              | 0          | 6             | 0          | 0           | 100          |
| Pepsin         | 0       | 0          | 0            | 0          | 0              | 0          | 0             | 6          | 0           | 100          |
| Trypsin        | 0       | 0          | 0            | 0          | 0              | 0          | 0             | 0          | 6           | 100          |
| Total          | 6       | 6          | 6            | 6          | 6              | 6          | 6             | 6          | 6           | 100          |

The jackknifed classification illustrates no overlap between the groups at all, and all the cases are classified with 100% classification accuracy.

Cumulative proportion of total dispersion

|       |       |       |       |       |       |
|-------|-------|-------|-------|-------|-------|
| 0.630 | 0.895 | 0.990 | 0.995 | 0.999 | 1.000 |
|-------|-------|-------|-------|-------|-------|

The first and second factors account for 63% and 26.5% (0.895-0.630). These figures are clearly larger than the third and fourth factors, 9.5% (0.990-0.895) and 0.5% (0.995-0.990).

Table S5. Jackknifed Classification Matrix of LDA analysis in 8 proteins differentiation (50  $\mu$ M)

|                | BS<br>A | Casei<br>n | Lysozy<br>me | Papai<br>n | Hemoglob<br>in | Lipas<br>e | Myoglobi<br>n | Pepsi<br>n | Trypsi<br>n | %corre<br>ct |
|----------------|---------|------------|--------------|------------|----------------|------------|---------------|------------|-------------|--------------|
| BSA            | 6       | 0          | 0            | 0          | 0              | 0          | 0             | 0          | 0           | 100          |
| Casein         | 0       | 6          | 0            | 0          | 0              | 0          | 0             | 0          | 0           | 100          |
| Lysozyme       | 0       | 0          | 6            | 0          | 0              | 0          | 0             | 0          | 0           | 100          |
| Papain         | 0       | 0          | 0            | 6          | 0              | 0          | 0             | 0          | 0           | 100          |
| Hemoglobi<br>n | 0       | 0          | 0            | 0          | 6              | 0          | 0             | 0          | 0           | 100          |
| Lipase         | 0       | 0          | 0            | 0          | 0              | 6          | 0             | 0          | 0           | 100          |
| Myoglobin      | 0       | 0          | 0            | 0          | 0              | 0          | 6             | 0          | 0           | 100          |
| Pepsin         | 0       | 0          | 0            | 0          | 0              | 0          | 0             | 6          | 0           | 100          |
| Trypsin        | 0       | 0          | 0            | 0          | 0              | 0          | 0             | 0          | 6           | 100          |
| Total          | 6       | 6          | 6            | 6          | 6              | 6          | 6             | 6          | 6           | 100          |

The jackknifed classification illustrates no overlap between the groups at all, and all the cases are classified with 100% classification accuracy.

Cumulative proportion of total dispersion

|       |       |       |       |       |       |
|-------|-------|-------|-------|-------|-------|
| 0.735 | 0.887 | 0.997 | 0.999 | 1.000 | 1.000 |
|-------|-------|-------|-------|-------|-------|

The first three factors account for 73.5%, 15.2% (0.887-0.735) and 11% (0.997-0.887) respectively. And the fourth factor just contribute little to the classification (0.2%, 0.999-0.997).

Table S6. Jackknifed Classification Matrix of LDA analysis in 5 bacteria differentiation

|                           | Bacillus<br>aceticus | Bacillus<br>natto | Bacillus | Escherichia<br>coli | Pseudomonas<br>aeruginosa | %correct |
|---------------------------|----------------------|-------------------|----------|---------------------|---------------------------|----------|
| Bacillus<br>aceticus      | 2                    | 0                 | 4        | 0                   | 0                         | 33       |
| Bacillus natto            | 0                    | 6                 | 0        | 0                   | 0                         | 100      |
| Bacillus                  | 2                    | 0                 | 4        | 0                   | 0                         | 67       |
| Escherichia<br>coli       | 0                    | 0                 | 0        | 6                   | 0                         | 100      |
| Pseudomonas<br>aeruginosa | 0                    | 0                 | 0        | 0                   | 0                         | 100      |
| Total                     | 4                    | 6                 | 8        | 6                   | 6                         | 80       |

The jackknifed classification illustrates overlap between Bacillus aceticus and Bacillus. Four cases of Bacillus aceticus were misclassified to Bacillus, and the accuracy is just 33%. Similarly, two cases of Bacillus were misclassified to Bacillus aceticus, and the accuracy is around 67%. Besides, the rest of cases can be totally classified.

Cumulative proportion of total dispersion

|       |       |       |       |
|-------|-------|-------|-------|
| 0.813 | 0.931 | 0.997 | 1.000 |
|-------|-------|-------|-------|

It is worth noting that the first factor (81.3%) is significantly larger than other factors. The second factor accounts for 11.8% (0.931-0.813), and this figure is larger than the third factor (6.6%, 0.997-0.931).
